# Supplementary material
Source: publisher figshare collection journal article supplement (https://gsapubs.figshare.com/ndownloader/files/22409349)
Supplement: Supplementary file 1 [file 22409349]

Cyr, A.J., Miller, D.M., and Mahan, S. A., 2015, Paleodischarge of the Mojave River, southwestern United States, investigated with single-pebble measurements of 10Be: Geosphere, v. 11, doi:10.1130/GES01134.1.

http://dx.doi.org/10.1130/GES01134.S5

| SUPPLEMENTAL TABLE 4. MOJAVE RIVER CHANNEL GEOMETRY BETWEEN THE DAM AT THE FORKS AND THE LOCATION WHERE PEBBLES WERE COLLECTED | | | | | | |
| --- | --- | --- | --- | --- | --- | --- |
| Profile no. | Channel width | Channel depth | Hydraulic radius | Cross-sectional area | Wetted perimeter | Unit stream power |
|  | (m) | (m) |  | (m2) | (m) |  |
| 1 | 50 | 1 | 0.96 | 50 | 52 | 52.88 |
| 2 | 85 | 1 | 0.97 | 85 | 87 | 31.10 |
| 3 | 110 | 1 | 0.98 | 110 | 112 | 24.03 |
| 4 | 150 | 1 | 0.98 | 150 | 152 | 17.63 |
| 5 | 150 | 1 | 0.98 | 150 | 152 | 17.63 |
| 6 | 175 | 1 | 0.98 | 175 | 177 | 15.11 |
| 7 | 175 | 1 | 0.98 | 175 | 177 | 15.11 |
| 8 | 175 | 1 | 0.98 | 175 | 177 | 15.11 |
| 9 | 200 | 1 | 0.99 | 200 | 202 | 13.22 |
| 10 | 100 | 2 | 1.92 | 200 | 104 | 26.44 |
| 11 | 200 | 1 | 0.99 | 200 | 202 | 13.22 |
| 12 | 250 | 1 | 0.99 | 250 | 252 | 10.58 |
| 13 | 250 | 1 | 0.99 | 250 | 252 | 10.58 |
| 14 | 350 | 1 | 0.99 | 350 | 352 | 7.55 |
| 15 | 200 | 2 | 1.96 | 400 | 204 | 13.22 |
| 16 | 400 | 1 | 0.99 | 400 | 402 | 6.61 |
| 17 | 465 | 1 | 0.99 | 465 | 467 | 5.69 |
| 18 | 250 | 2 | 1.96 | 500 | 254 | 10.58 |
| 19 | 500 | 1 | 0.99 | 500 | 502 | 35.29 |
| 20 | 250 | 2 | 1.96 | 500 | 254 | 10.56 |
| 21 | 550 | 1 | 0.99 | 550 | 552 | 4.81 |
| 22 | 375 | 1.5 | 1.48 | 562.5 | 378 | 7.05 |
| 23 | 400 | 1.5 | 1.48 | 600 | 403 | 6.61 |
| 24 | 300 | 2 | 1.97 | 600 | 304 | 8.81 |
| 25 | 225 | 3 | 2.92 | 675 | 231 | 11.75 |
| 26 | 350 | 2 | 1.97 | 700 | 354 | 7.53 |
| 27 | 750 | 1 | 0.99 | 750 | 752 | 3.53 |
| 28 | 400 | 2 | 1.98 | 800 | 404 | 6.61 |
| 29 | 400 | 2 | 1.98 | 800 | 404 | 6.61 |
| 30 | 850 | 1 | 0.99 | 850 | 852 | 3.11 |
| 31 | 430 | 2 | 1.98 | 860 | 434 | 6.15 |
| 32 | 430 | 2 | 1.98 | 860 | 434 | 6.15 |
| 33 | 450 | 2 | 1.98 | 900 | 454 | 5.88 |
| 34 | 930 | 1 | 0.99 | 930 | 932 | 2.84 |
| 35 | 500 | 2 | 1.98 | 1000 | 504 | 5.29 |
| 36 | 525 | 2 | 1.98 | 1050 | 529 | 5.04 |
| 37 | 550 | 2 | 1.98 | 1100 | 554 | 4.81 |
| 38 | 375 | 3 | 2.95 | 1125 | 381 | 7.05 |
| 39 | 1200 | 1 | 0.99 | 1200 | 1202 | 2.20 |
| 40 | 600 | 2 | 1.98 | 1200 | 604 | 4.41 |
| 41 | 600 | 2 | 1.98 | 1200 | 604 | 4.41 |
| 42 | 300 | 4 | 3.89 | 1200 | 308 | 8.81 |
| 43 | 325 | 2 | 1.98 | 1250 | 629 | 4.23 |
| 44 | 650 | 2 | 1.98 | 1300 | 654 | 4.07 |
| 45 | 740 | 2 | 1.98 | 1480 | 744 | 3.57 |
| 46 | 800 | 2 | 1.99 | 1600 | 804 | 3.31 |
| 47 | 800 | 2 | 1.99 | 1600 | 804 | 3.31 |
| 48 | 800 | 2 | 1.99 | 1600 | 804 | 3.31 |
| 49 | 800 | 2 | 1.99 | 1600 | 804 | 3.31 |
| 50 | 850 | 2 | 1.99 | 1700 | 854 | 3.11 |
| 51 | 925 | 2 | 1.99 | 1850 | 929 | 2.86 |
| 52 | 1025 | 2 | 1.99 | 2050 | 1029 | 2.58 |
| 53 | 1175 | 2 | 1.99 | 2350 | 1179 | 2.25 |
| 54 | 1200 | 2 | 1.99 | 2400 | 1204 | 2.20 |
